# Supplementary material for: 17β-Estradiol Promotes Schwann Cell Proliferation and Differentiation, Accelerating Early Remyelination in a Mouse Peripheral Nerve Injury Model
Source: Hindawi journal article supplement (doi:10.1155/2016/7891202), 2016-01-01

## **Supplementary figures**

### **Fig S1. Nerve bridge formed after sciatic nerve transection in mouse.**

A. Observation of nerve bridge formation in longitudinal section of transected mouse SNs by an ordinary stereomicroscope without any staining (DS: distal stump; NB: nerve bridge; PS: proximal stump; SN, sciatic nerve).

B. A photo of SN at the 10th day after transection shows a myelin lacking nerve bridge site, which looked more transparent, and myelin-bearing distal stump (DS) and proximal stump (PS) on both sides of the nerve bridge (NB), which looked white and opaque.

C. Toluidine blue staining of transverse semi-thin sections of intact SN, nerve bridge at post day 10 and distal stump at post day 10 and 15. Scale bars represent 100  $\mu$ M.

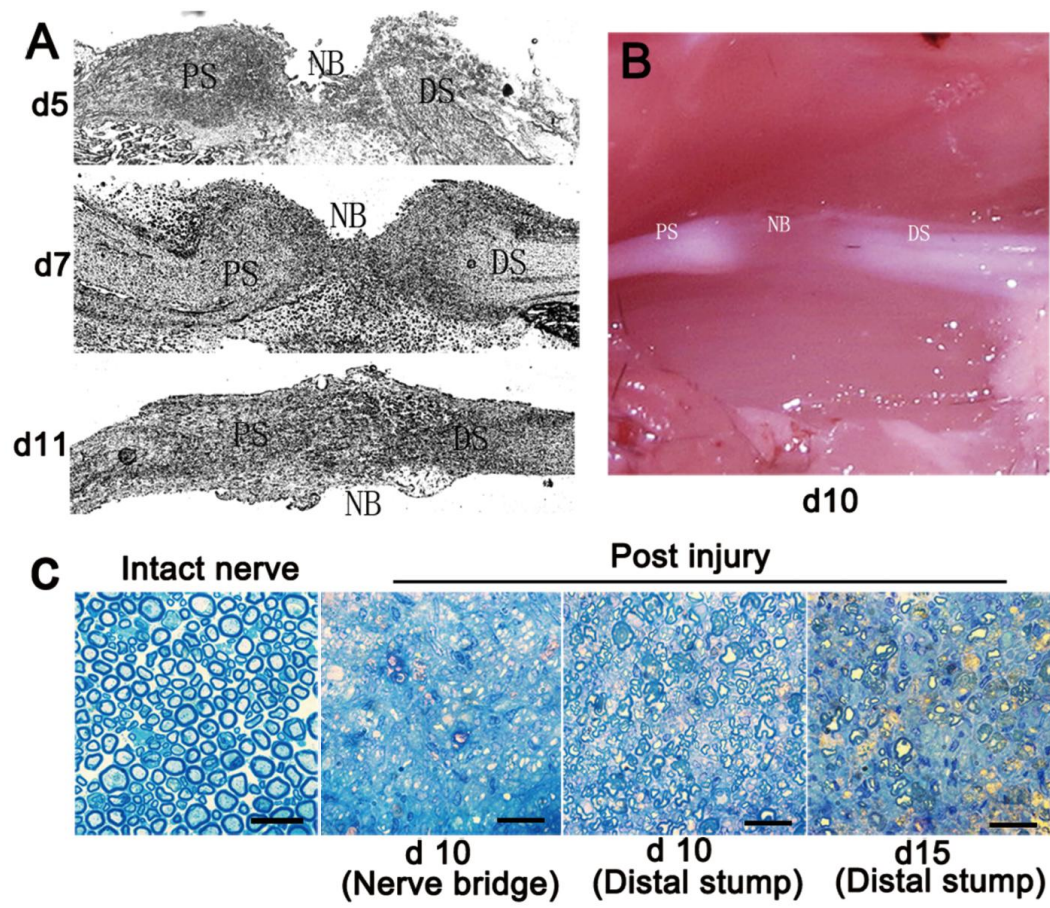

**Fig S2. 17 $\beta$ -estradiol promoted Schwann cell proliferation.**

A. BrdU staining (red signals) for primary Schwann cells treated with E2 or DMSO for 24 h in culture medium without  $\beta$ 1-herregulin but with forskolin. S100 $\beta$  co-staining (green signals) was used to illustrate Schwann cells. Scale bars represent 100  $\mu$ M (200 $\times$ ).

B. Quantification of BrdU-positive Schwann cells from C (n=5, \*\* $P$ <0.01).

C. Ki67 staining (red signals) in the longitudinal section of nerve bridge site in injured Sciatic nerve from E2-treated and control mice. Sox10 was co-stained (green signals) to illustrate Schwann cell lineage cells. Scale bars represent 100  $\mu$ M (200 $\times$ ).

D. Quantification of BrdU-positive Schwann cells from E (n=5, \* $P$ <0.05). BrdU, 5-bromo-2'-deoxyuridine; DMSO, dimethyl sulfoxide.

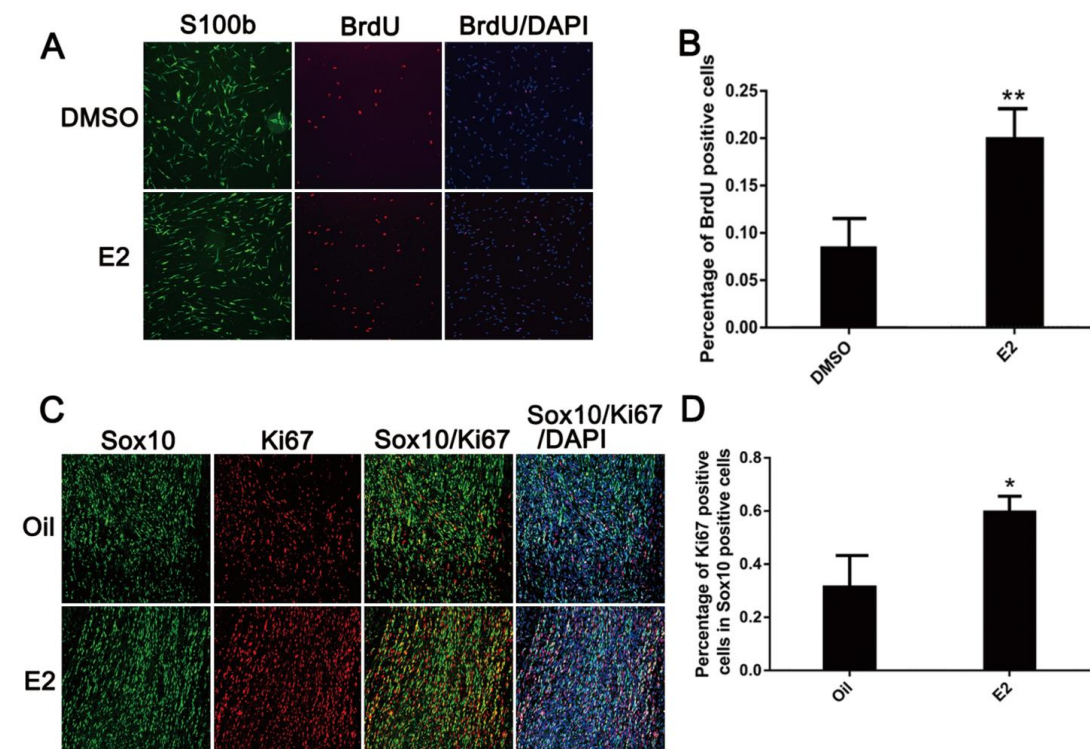

**Fig S3. 17 $\beta$ -estradiol promoted Erk phosphorylation in dependence of AKT pathway.**

A. Western blotting of Erk1 and phosphorylated Erk1 (p-Erk1) in nerve bridge tissue lysate.

B. Quantification of the relative intensity of p-Erk1 expression based on A (n=3).

C. Western blotting of Erk1 and p-Erk1 expression in primary SCs treated with E2, E2+MK2206 or DMSO for different duration.

D. Quantification of the relative intensity of p-Erk1 expression based on C (n=3, \*P<0.05 E2 vs DMSO; \*\*P<0.01 E2 vs Oil). DMSO, dimethyl sulfoxide; SC, sciatic nerve.

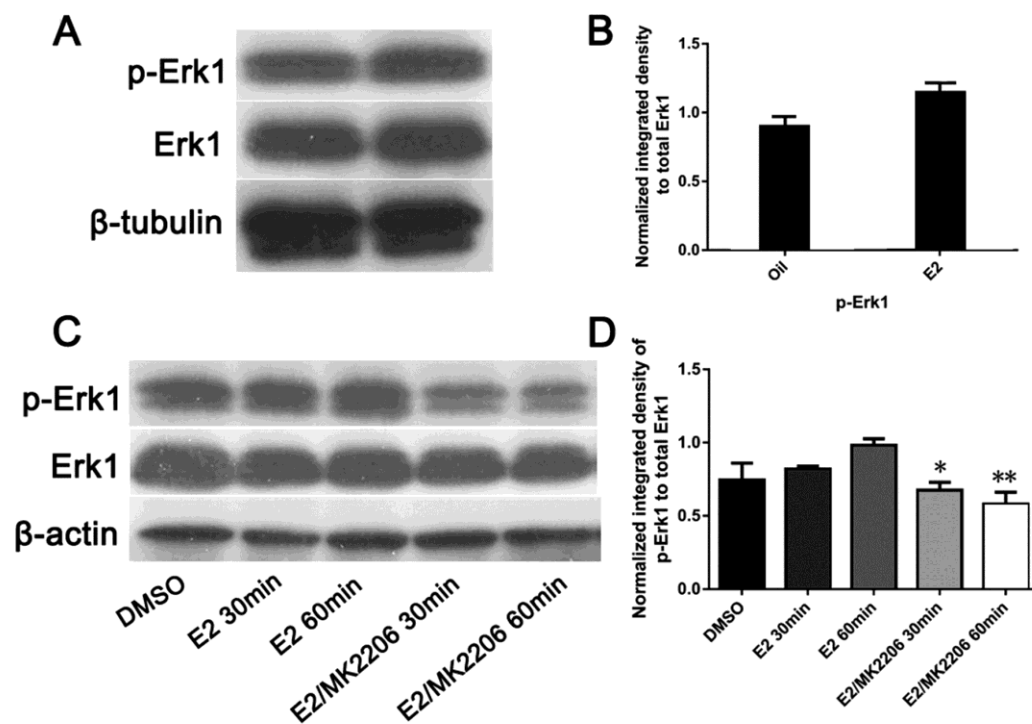

Supplement: f1 [file 7891202.f1.pdf]
